# Supplementary material
Source: HighWire-hosted journal article supplement (https://erj.ersjournals.com/content/61/1/2201347)
Supplement: inline-supplementary-material-3 [file inline-supplementary-material-3.pdf]

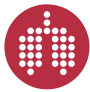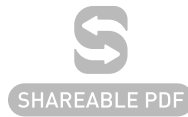

# Sotatercept for the treatment of pulmonary arterial hypertension: PULSAR open-label extension

Marc Humbert <sup>1</sup>, Vallerie McLaughlin<sup>2</sup>, J. Simon R. Gibbs<sup>3</sup>, Mardi Gomberg-Maitland<sup>4</sup>, Marius M. Hoeper <sup>5</sup>, Ioana R. Preston<sup>6</sup>, Rogerio Souza <sup>7</sup>, Aaron B. Waxman <sup>8</sup>, Hossein-Ardeschir Ghofrani <sup>9</sup>, Pilar Escribano Subias <sup>10</sup>, Jeremy Feldman<sup>11</sup>, Gisela Meyer<sup>12</sup>, David Montani <sup>1</sup>, Karen M. Olsson<sup>5</sup>, Solaiappan Manimaran<sup>13</sup>, Janethe de Oliveira Pena<sup>13</sup> and David B. Badesch<sup>14</sup>

<sup>1</sup>Department of Respiratory and Intensive Care Medicine, Hôpital Bicêtre, Assistance Publique-Hôpitaux de Paris, INSERM Unité Mixte de Recherche 999, Université Paris-Saclay, Le Kremlin-Bicêtre, France. <sup>2</sup>Division of Cardiovascular Medicine, Department of Internal Medicine, University of Michigan Health System, Ann Arbor, MI, USA. <sup>3</sup>National Heart and Lung Institute, Imperial College London, and the National Pulmonary Hypertension Service, Hammersmith Hospital, Imperial College Healthcare NHS Trust, London, UK. <sup>4</sup>Department of Medicine, George Washington University School of Medicine and Health Sciences, Washington, DC, USA. <sup>5</sup>Department of Respiratory Medicine, Hannover Medical School, and the German Center for Lung Research (DZL), Hannover, Germany. <sup>6</sup>Division of Pulmonary, Critical Care and Sleep Medicine, Tufts Medical Center, Boston, MA, USA. <sup>7</sup>Pulmonary Division-Heart Institute, University of São Paulo Medical School, São Paulo, Brazil. <sup>8</sup>Division of Pulmonary and Critical Care Medicine, Department of Medicine, Brigham and Women's Hospital, Harvard Medical School, Boston, MA, USA. <sup>9</sup>Department of Pneumology, University of Giessen and Marburg, Giessen, Germany. <sup>10</sup>Department of Cardiology, Centro de Investigación Biomédica en Red en Enfermedades Cardiovasculares, Hospital Universitario 12 de Octubre, Universidad Complutense, Madrid, Spain. <sup>11</sup>Arizona Pulmonary Specialists, Phoenix, AZ, USA. <sup>12</sup>Complexo Hospitalar Santa Casa de Porto Alegre, Pulmonary Vascular Research Institute, Porto Alegre, Brazil. <sup>13</sup>Acceleron Pharma Inc., a wholly owned subsidiary of Merck & Co., Inc., Rahway, NJ, USA. <sup>14</sup>Division of Pulmonary Sciences and Critical Care Medicine, and Cardiology, University of Colorado, Anschutz Medical Campus, Aurora, CO, USA.

Corresponding author: David B. Badesch ([David.badesch@cuanschutz.edu](mailto:David.badesch@cuanschutz.edu))

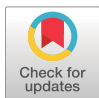

Shareable abstract (@ERSpublications)

This report characterises the longer-term safety and efficacy of sotatercept in adult participants with pulmonary arterial hypertension from the PULSAR open-label extension period <https://bit.ly/3QqezKH>

**Cite this article as:** Humbert M, McLaughlin V, Gibbs JSR, *et al.* Sotatercept for the treatment of pulmonary arterial hypertension: PULSAR open-label extension. *Eur Respir J* 2023; 61: 2201347 [DOI: 10.1183/13993003.01347-2022].

This single-page version can be shared freely online.

Copyright ©The authors 2023.

This version is distributed under the terms of the Creative Commons Attribution Non-Commercial Licence 4.0. For commercial reproduction rights and permissions contact [permissions@ersnet.org](mailto:permissions@ersnet.org)

This article has an editorial commentary: <https://doi.org/10.1183/13993003.01972-2022>

Received: 5 July 2022  
Accepted: 2 Aug 2022

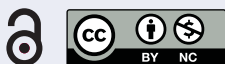

## Abstract

**Background** In participants with pulmonary arterial hypertension, 24 weeks of sotatercept resulted in a significantly greater reduction from baseline in pulmonary vascular resistance than placebo. This report characterises the longer-term safety and efficacy of sotatercept in the PULSAR open-label extension. We report cumulative safety, and efficacy at months 18–24, for all participants treated with sotatercept.

**Methods** PULSAR was a phase 2, randomised, double-blind, placebo-controlled study followed by an open-label extension, which evaluated sotatercept on top of background pulmonary arterial hypertension therapy in adults. Participants originally randomised to placebo were re-randomised 1:1 to sotatercept 0.3 or 0.7 mg·kg<sup>-1</sup> (placebo-crossed group); those initially randomised to sotatercept continued the same sotatercept dose (continued-sotatercept group). Safety was evaluated in all participants who received ≥1 dose of sotatercept. The primary efficacy endpoint was change from baseline to months 18–24 in pulmonary vascular resistance. Secondary endpoints included 6-min walk distance and functional class. Two prespecified analyses, placebo-crossed and delayed-start, evaluated efficacy irrespective of dose.

**Results** Of 106 participants enrolled in the PULSAR study, 97 continued into the extension period. Serious treatment-emergent adverse events were reported in 32 (30.8%) participants; 10 (9.6%) reported treatment-emergent adverse events leading to study discontinuation. Three (2.9%) participants died, none considered related to study drug. The placebo-crossed group demonstrated significant improvement across primary and secondary endpoints and clinical efficacy was maintained in the continued-sotatercept group.

**Conclusion** These results support the longer-term safety and durability of clinical benefit of sotatercept for pulmonary arterial hypertension.
